# Supplementary material for: PBRN Findings: Integrated Care for Individuals With Serious Mental Illnesses
Source: Atypon-hosted journal article supplement (doi:10.1176/appi.ps.201500075), 2015-11-01
Supplement: appi.ps.201500075.ds001.pdf [file appi.ps.201500075.ds001.pdf]

Table 1

*Self-Reported Changes in Physical and Mental Health after Receipt of Integrated Services*

| Variables                                     | Less     |     | Same     |     | More     |     | Single<br>Sample $\chi^2$ | Degrees of<br>Freedom |
|-----------------------------------------------|----------|-----|----------|-----|----------|-----|---------------------------|-----------------------|
|                                               | <i>N</i> | %   | <i>N</i> | %   | <i>N</i> | %   |                           |                       |
| Emergency Room Visits                         | 166      | 72% | 38       | 16% | 28       | 12% | < .001                    | 231                   |
| Primary Care Visits                           | 67       | 29% | 76       | 33% | 90       | 39% | < .001                    | 232                   |
| Physical Health Symptoms                      | 111      | 50% | 85       | 38% | 26       | 12% | < .001                    | 221                   |
|                                               | Worse    |     | Same     |     | Improved |     |                           |                       |
|                                               | <i>N</i> | %   | <i>N</i> | %   | <i>N</i> | %   |                           |                       |
| Access to Health Care                         | 9        | 4%  | 64       | 27% | 162      | 69% | <.001                     | 234                   |
| Lifestyle                                     | 6        | 3%  | 46       | 21% | 172      | 77% | < .001                    | 223                   |
| Mental Health Status                          | 12       | 5%  | 43       | 19% | 171      | 76% | < .001                    | 225                   |
| Able to Meet Mental<br>Health Treatment Goals | 5        | 2%  | 39       | 7%  | 182      | 81% | < .001                    | 225                   |
| Physical Health                               | 18       | 8%  | 76       | 34% | 132      | 58% | < .001                    | 225                   |
| Satisfaction with Services                    | 4        | 2%  | 61       | 27% | 160      | 71% | < .001                    | 224                   |
